# Supplementary material
Source: MDPI journal article supplement (https://www.mdpi.com/1999-4907/12/12/1718)
Supplement: s1 [file s1]

## Supplementary Materials:

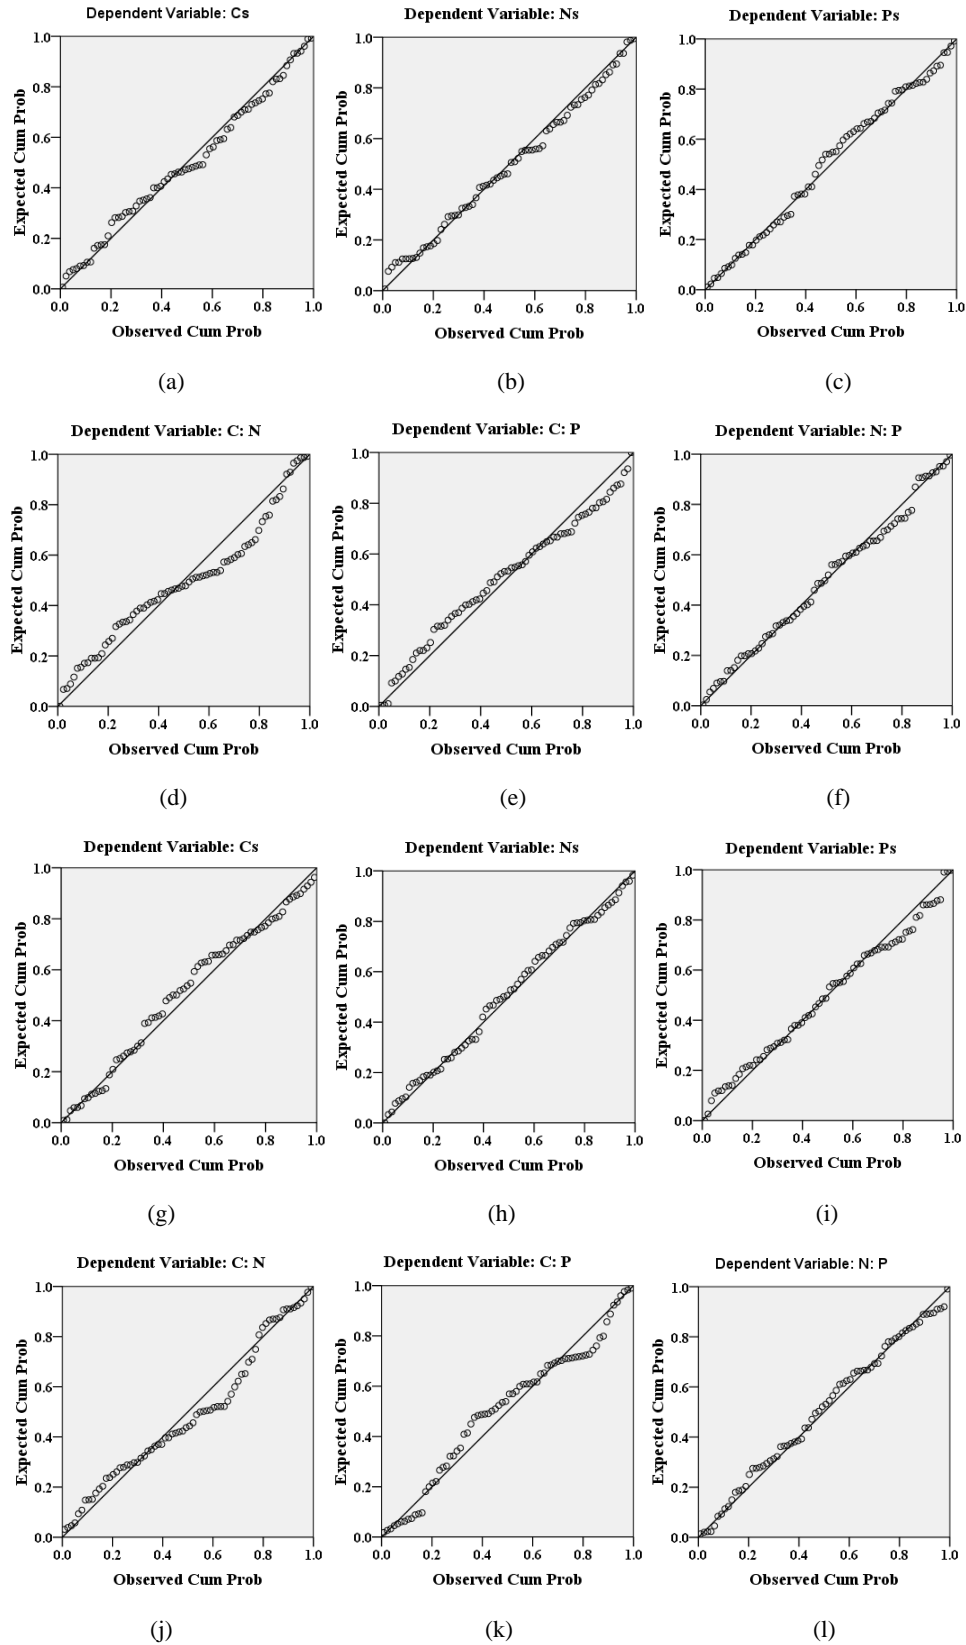

**Figure S1:** Normal P-P plots of regression standardized residuals. (a-f) represent the normality test results of the SOC, TN and TP storages and stoichiometric ratios and their influencing factors in the pure plantations, respectively. (g-l) represent the normality test results of the the SOC, TN and TP storages and stoichiometric ratios and their influencing factors in the mixed plantations, respectively.
